# Supplementary material
Source: publisher figshare collection journal article supplement (https://tandf.figshare.com/ndownloader/files/17810135)
Supplement: Supplementary file 1 [file 17810135]

**Supplementary Information**

**A developed chromogenic probe for determination of dual analyte with logic gates function and keypad-lock**

**Hossein Tavallali *, Gohar Deilamy-Rad, Abolfath Parhami, Maryam Heidari, Narges Mosllanejad**

*Department of Chemistry, Payame Noor University 19395-4697 Tehran, Islamic Republic of Iran*

**Corresponding author E-mail address: Tavallali@pnu.ac.ir,* [*Tavallali@yahoo.com*](mailto:Tavallali@yahoo.com) *(H. Tavallali)*

**Figures S1-S6…………………………………………………………….S2-7 page**

**
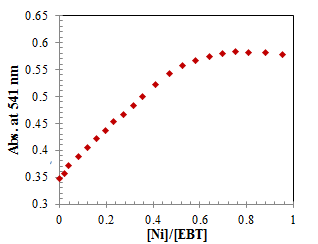
**

**Figure S1.** Moleratio plot between EBT and Ni2+ in H2O/DMSO (9:1, v/v) at 25 ◦C.

**
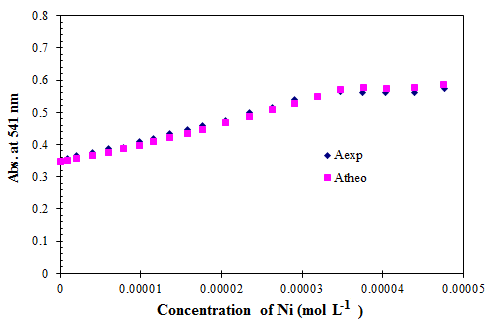
**

**Figure S2.** The association constants by nonlinear fitting analysis of the titration curves according to the host–guest complexation at 541 nm for EBT(50.0 µmol L-1) upon titration with Ni2+. (1.0×10-7–5.0×10-5 mol L-1) in H2O/DMSO (9:1, v/v).

**
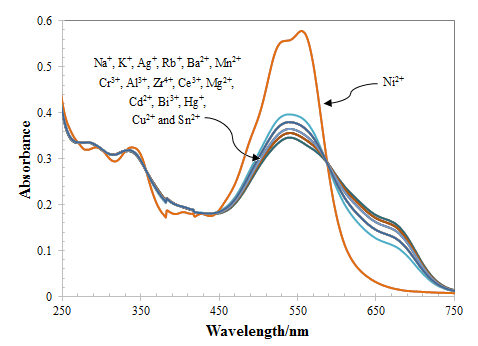
**

**Figure S3.** UV–Vis spectra changes of solution of EBT (50.0 µmol L-1) upon addition of a specific metal ion (200.0 µmol L-1) in H2O/DMSO (9:1, v/v).

**
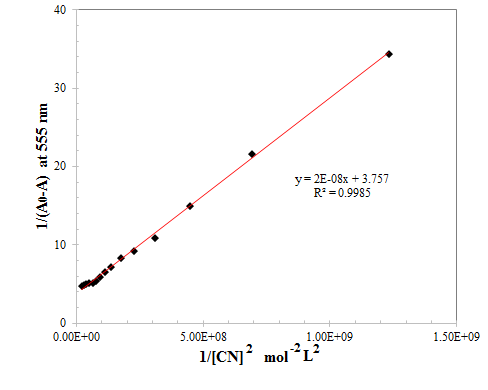
**

**Figure S4.** Benesi-Hildebrand plot at 555 nm for [Ni-(EBT)2]2+ upon titration with CN- (1.0×10-7–2.2×10-4 mol L-1) in H2O/DMSO (9:1, v/v).

**
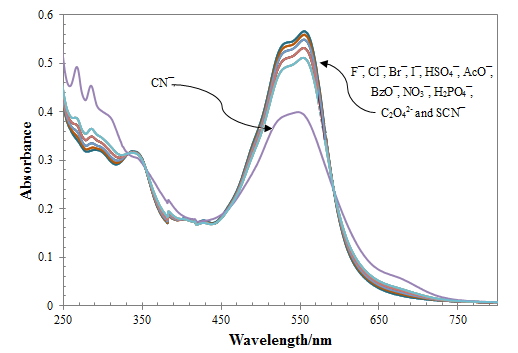
**

**Figure S5.** UV–Vis spectra changes of solution of [Ni-(EBT)2]2+ upon addition of a specific anions (400 µmol L-1) in H2O/DMSO (9:1, v/v).


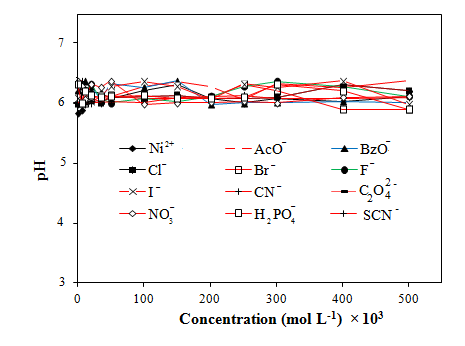


**Figure S6.**  Changes in the pH value of EBT (5.0 ×10-5 mol L-1) upon addition of Ni(NO3)2 and [Ni-(EBT)2]2+ upon addition potassium salts all of other anions (1.0 × 10-4 –5.0 × 10-1 mol L-1 cation and anions) in H2O/DMSO (9:1, v/v).
